# Supplementary material for: MicroRNA signatures in B-cell lymphomas
Source: PubMed Central journal article supplement — Blood Cancer J. 2012 Feb 17;2(2):e57–. doi: 10.1038/bcj.2012.1 (PMC3288280; doi:10.1038/bcj.2012.1), 2012-02-17

**Supplementary Figure 2.** Unsupervised cluster of 28BL and 43DLBCL using the 19 miRNAs confirmed in qPCR experiments. DLBCL subtype classification according to Hans' algorithm (Blood, 2004), and myc and bcl2 status are annotated.  $-\Delta Ct$  values were here used to classify BL and DLBCL samples. Only 5 out of 71 (7%) cases were misclassified.

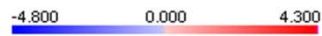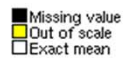

5/71 cases misclassified (1/28 BL and 4/43 DLBCL)

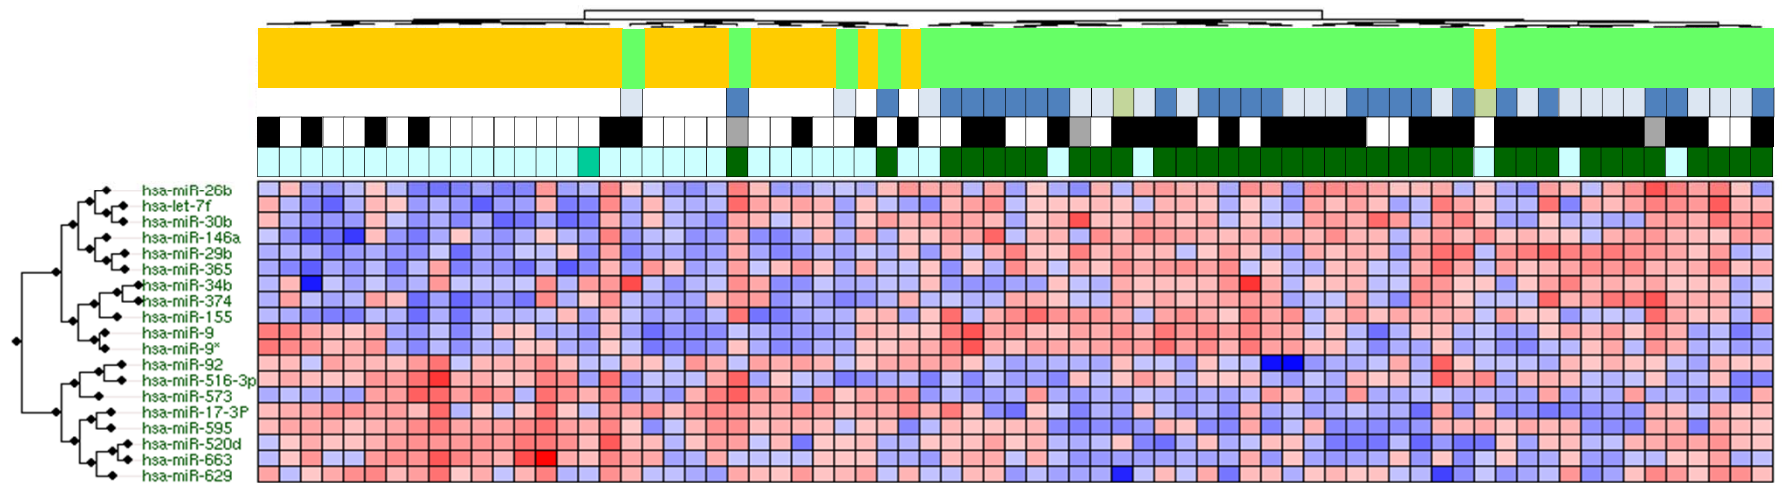

Lymphoma type

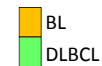

DLBCL subtype

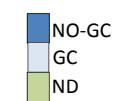

MYC status

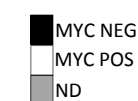

BCL2 status

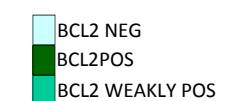

Supplement: bcj20121x2.pdf [file bcj20121x2.pdf]
