# Supplementary material for: MicroRNA signatures in B-cell lymphomas
Source: PubMed Central journal article supplement — Blood Cancer J. 2012 Feb 17;2(2):e57–. doi: 10.1038/bcj.2012.1 (PMC3288280; doi:10.1038/bcj.2012.1), 2012-02-17

Figure S3. C-MYC expression level in BL cases with and without C-MYC translocation. (A) protein expression measured as % of positive cells. (B) mRNA  $\Delta\Delta Ct$  values are represented in log2 scale

A

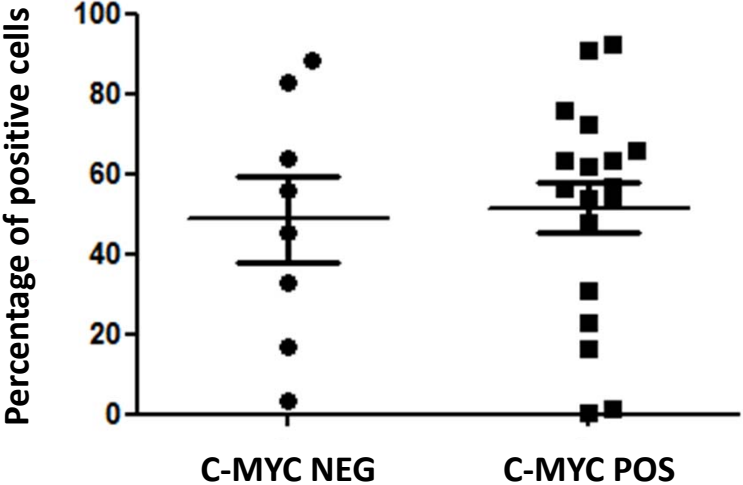

B

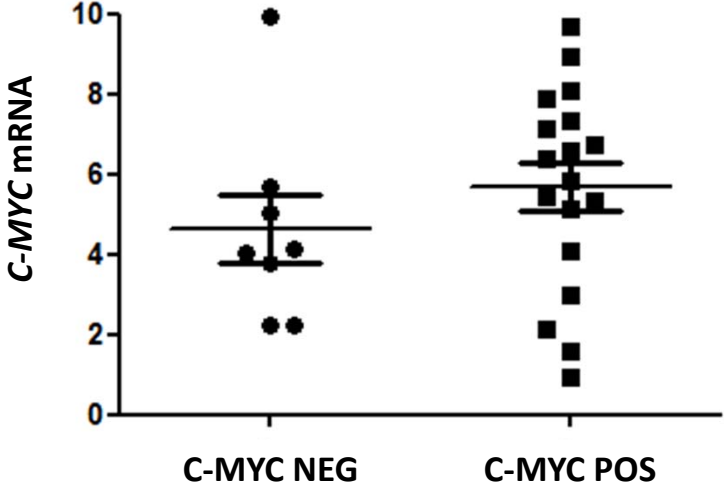

Supplement: bcj20121x3.pdf [file bcj20121x3.pdf]
