# Supplementary material for: MicroRNA signatures in B-cell lymphomas
Source: PubMed Central journal article supplement — Blood Cancer J. 2012 Feb 17;2(2):e57–. doi: 10.1038/bcj.2012.1 (PMC3288280; doi:10.1038/bcj.2012.1), 2012-02-17

Figure S4. Expression level of 14 miRNAs deregulated in B-cell lymphomas measured by qRT-PCR. MiRNA expression for each type of lymphoma is represented by the average expression of the cases (av). mRNA values ( $-\Delta Ct$ ) are normalized with normal tissue (3 tonsils and 4 lymph nodes; spleen for SMZL) and represented in log2 scale.

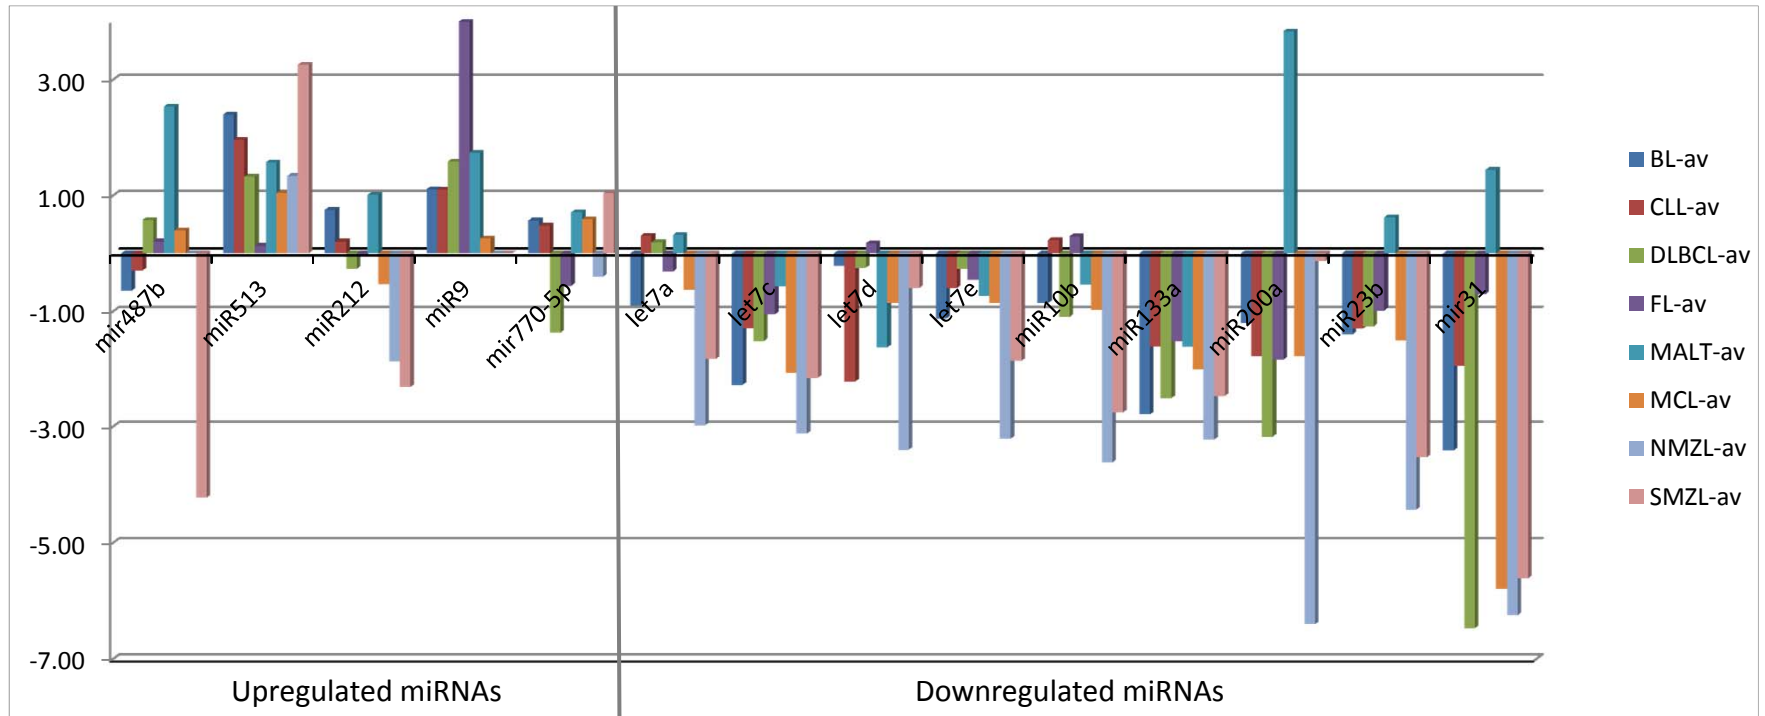

Supplement: bcj20121x4.pdf [file bcj20121x4.pdf]
